# Supplementary material for: Prediction of tissue rupture from percolation of local strain heterogeneities for diagnostics
Source: Springer Nature journal article supplement (doi:10.1038/s43856-025-00897-5), 2025-05-24
Supplement: MOESM1 [file 43856_2025_897_MOESM1_ESM.pdf]

# Prediction of tissue rupture from percolation of local strain heterogeneities for diagnostics

Friedrich Schütte<sup>1,2</sup>, Sabrina Friebe<sup>1,2</sup>, Denny Böttcher<sup>3</sup>, Michael Andrew Borger<sup>4</sup>, Madlen Uhlemann<sup>4†</sup> and Stefan G. Mayr<sup>1,2\*†</sup>

<sup>1</sup>Leibniz Institute of Surface Engineering (IOM), Permoserstr. 15, 04318 Leipzig, Germany.

<sup>2</sup>Division of Surface Physics, Department of Physics and Earth System Sciences, University of Leipzig, Linnéstr. 5, 04103 Leipzig, Germany.

<sup>3</sup>Faculty of Veterinary Medicine, University of Leipzig, An den Tierkliniken 33, 04103 Leipzig, Germany.

<sup>4</sup>Department of Cardiac Surgery, Leipzig Heart Center, Struempellstraße 39, 04289 Leipzig, Germany.

\*Corresponding author(s). E-mail(s): [stefan.mayr@iom-leipzig.de](mailto:stefan.mayr@iom-leipzig.de);

†Shared last authorship. These authors contributed equally to this work.



## Supplementary Note

### Extruded collagen fibers

**A MP4-movie of the tensile test is included as supplementary file.**

Linear fitting of [Figure 1](#) resulted in a Young's modulus of  $8.19 \pm 0.37$  MPa ( $R^2 > 0.41$ ) in low strain region up to 10% strain. Due to the sinusoidal increase of the mechanical deflection by means of a fine screw on the ZwickRoell testing machine, the behaviour of the original strains is not strictly linear, which is reflected in the DIC. A strain of 1% corresponds to a deflection of 20  $\mu\text{m}$ .

### Horse aorta

**A MP4-movie of the tensile test is included as supplementary file.**

The stress-strain curve resulting from a tensile test shows a largely linear behaviour up to the rupture point (see [Figure 2](#)) with a Young's modulus of  $0.291 \pm 0.1$  MPa ( $R^2 > 0.99$ ). The imaging of the horse aorta surface in parallel with the stress-strain experiment provided a set of images for DIC. The percolating cluster size shows a minimum at  $\approx 12.1\%$ , which indicates a concentration of local strain is at a maximum here (see [Figure 3](#)). Plastic behaviour may occur from this point onwards; the stretching process is supposed to be irreversible.

### Fibril network model

**A MP4-movie of the stress-coded fibril model is included as supplementary file.**



## Supplementary Figures

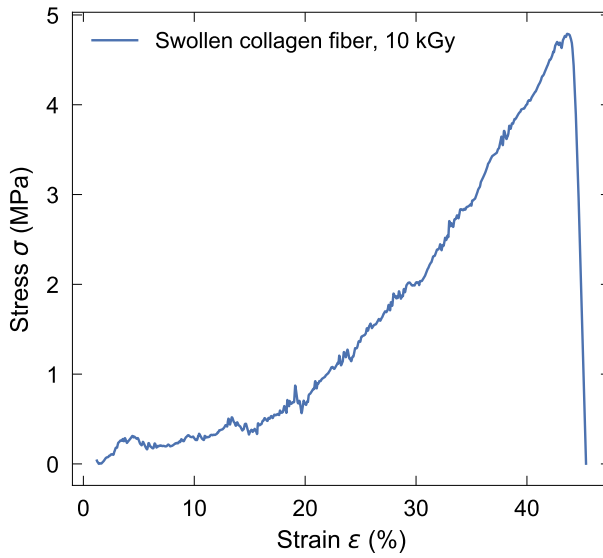

**Fig. 1** Stress-strain curve from tensile testing of a energetic electron crosslinked hydrated (swollen) collagen fiber (electron dose: 10 kGy, diameter 200  $\mu\text{m}$ ). The force offset due to the experimental setup was removed manually.



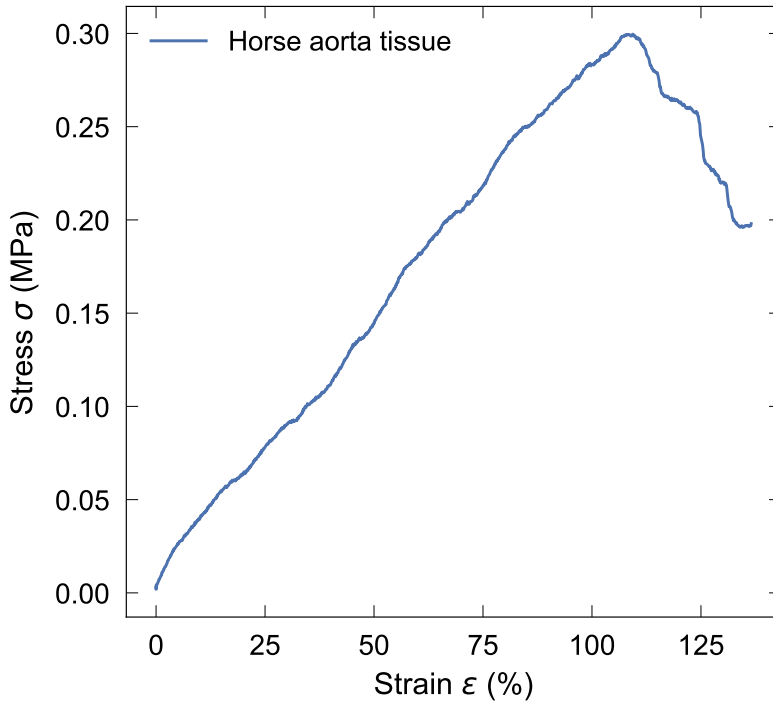

**Fig. 2** Stress-strain curve of a horse aorta explant until rupture.



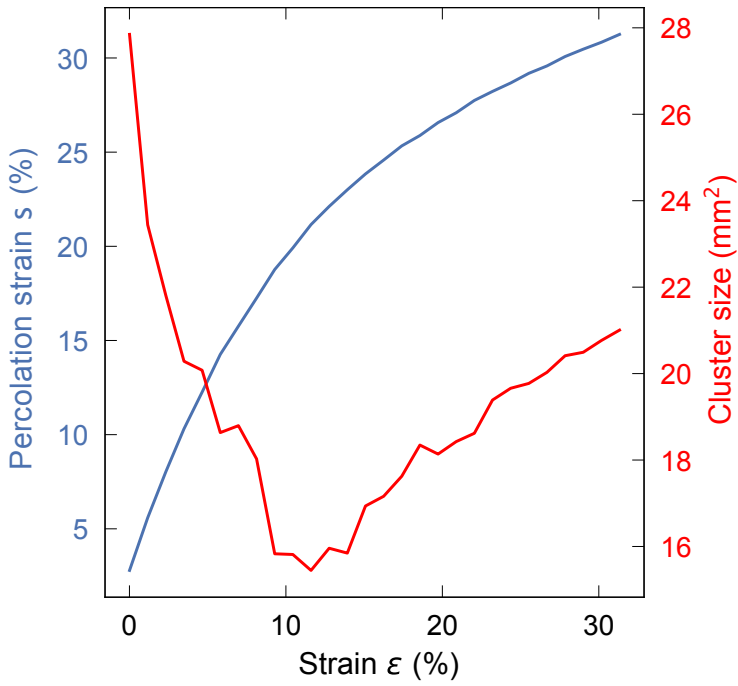

**Fig. 3** Percolation strain,  $s$ , and size of the percolation cluster for increasing global strains,  $\epsilon$ , as determined upon evaluation of tensile stretching behavior of a horse aorta explant.



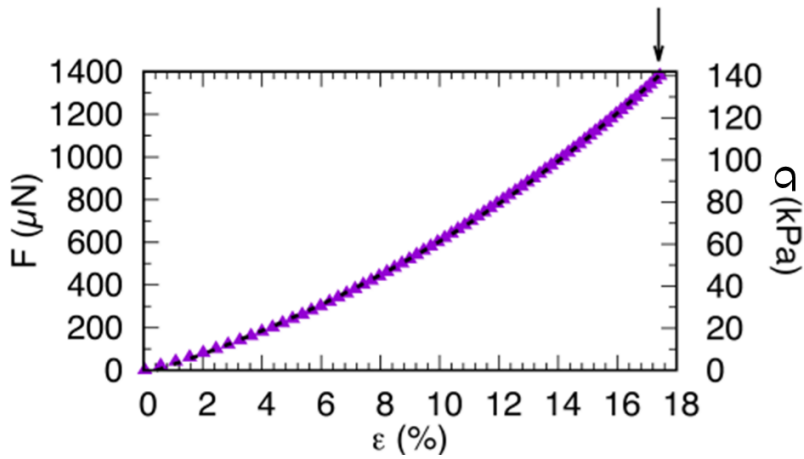

**Fig. 4** Green-Lagrange strain vs. force / First Piola Kirchhoff stress  $\sigma$  curve, as predicted by FEM calculations - together with an exponential fit to the data (dashed line). The arrow indicates the strain level that is exemplary discussed in more detail.



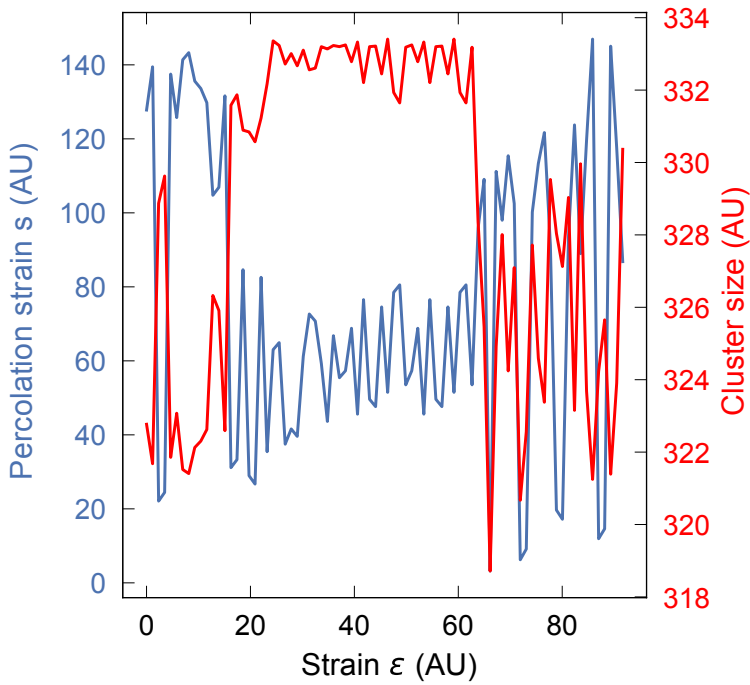

**Fig. 5** Percolation strain,  $s$ , and size of percolating cluster (measured in arbitrary units, AU), as function of global strain  $\epsilon$ , for the fibril network model.
